# Supplementary material for: Grafting of a new bis-silylamido aluminum species on silica: insight from solid-state NMR into interactions with the surface
Source: Royal Society of Chemistry journal article supplement (doi:10.1039/c9dt00845d), 2019-01-01
Supplement: c9dt00845d2.pdf [file c9dt00845d2.pdf]

## **Grafting of a new bis-silylamido aluminum species on silica: insight from solid-state NMR into interactions with the surface.**

Tom Vancompernelle,<sup>a</sup> Nicolas Merle,<sup>a</sup> Frédéric Capet,<sup>a</sup> Iker Del Rosal,<sup>b</sup> Laurent Maron,<sup>b</sup> Laurent Delevoye,<sup>a</sup> Frédérique Pourpoint<sup>a</sup> and Régis M. Gauvin<sup>a\*</sup>

<sup>a</sup> Univ. Lille, CNRS, Centrale Lille, ENSCL, Univ. Artois, UMR 8181 - UCCS - Unité de Catalyse et Chimie du Solide, F-59000 Lille, France.

<sup>b</sup> Laboratoire de Physico-Chimie des Nano-Objets, CNRS UMR 5215, Université de Toulouse, INSA, UPS, 135 avenue de Rangueil, F-31077 Toulouse, France.

### **Supporting Information**

#### **Table of contents**

Figure S1 : <sup>13</sup>C CPMAS NMR spectrum of **2**

**S2**

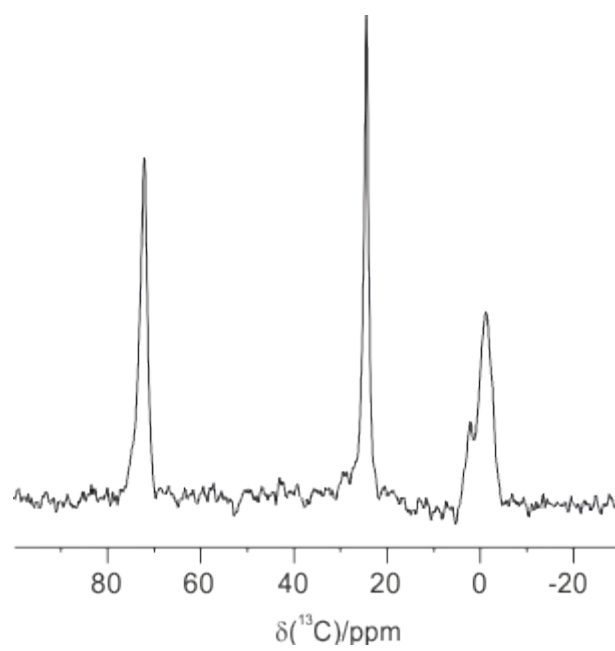

Figure S1.  $^{13}\text{C}$  CPMAS NMR spectrum of **2** (9.4 T)
